# Supplementary material
Source: PubMed Central journal article supplement (PMC10787516)
Supplement: NIHMS1926721-supplement-8.pdf [file NIHMS1926721-supplement-8.pdf]

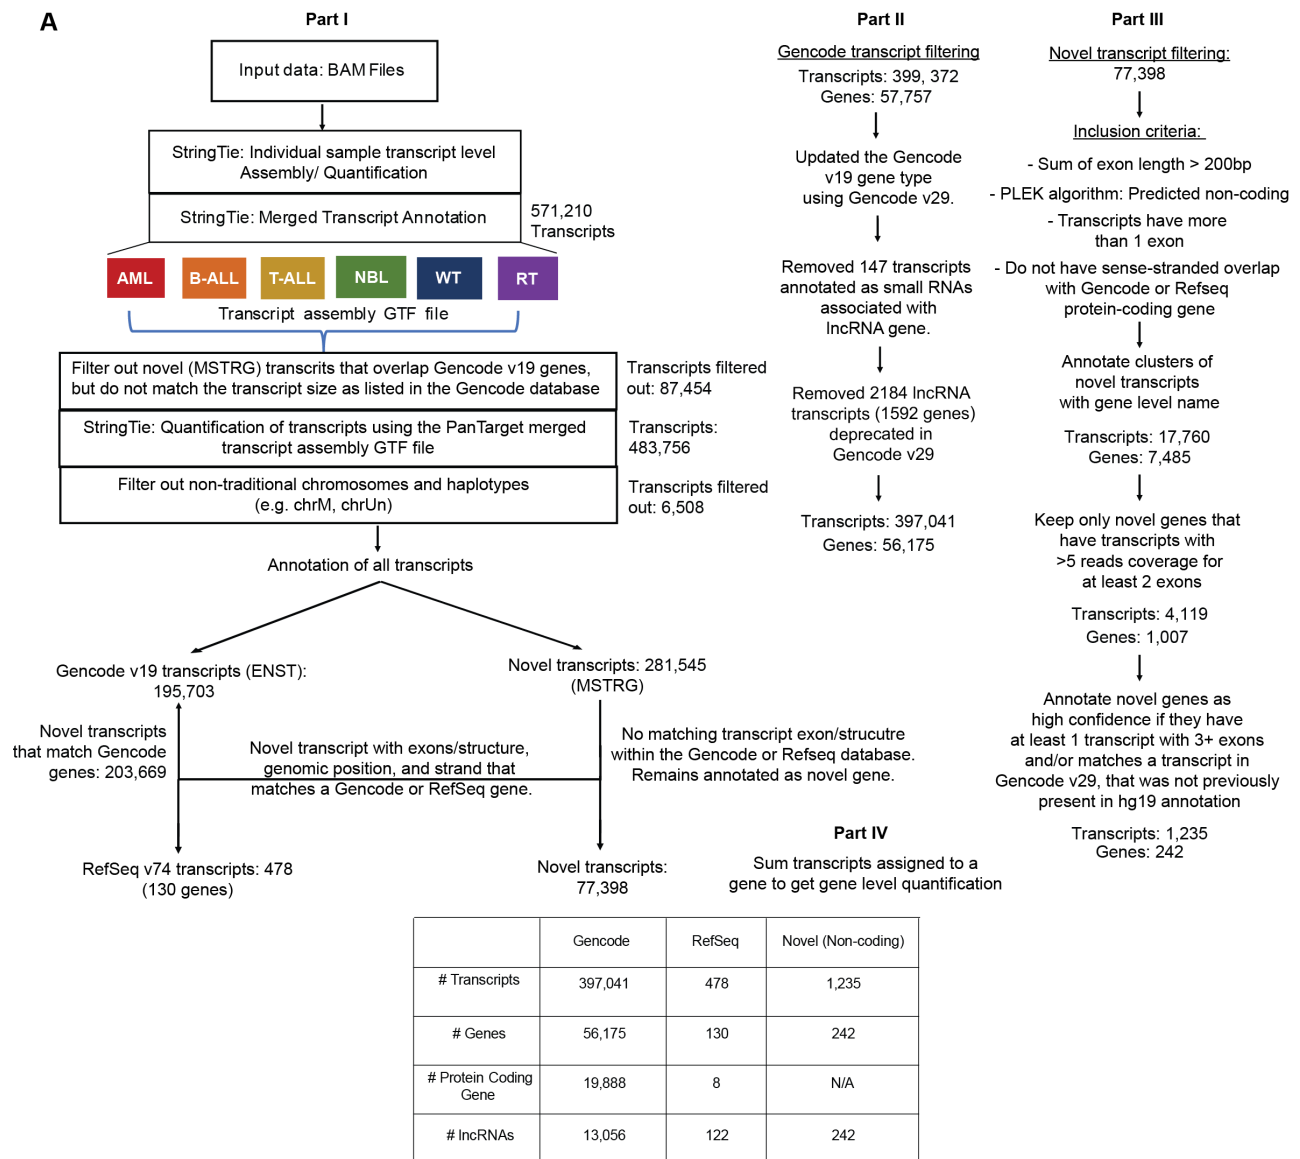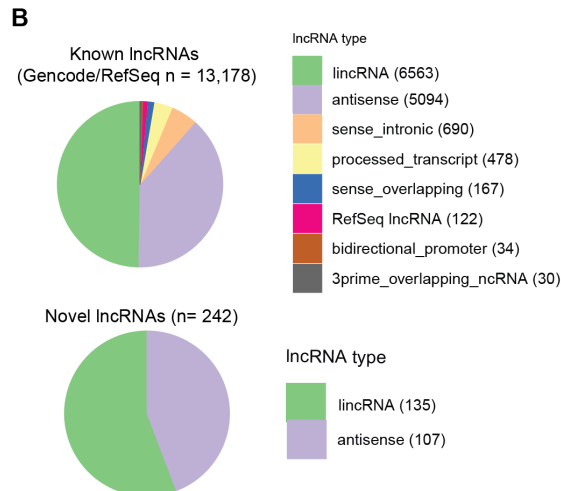

**Supplementary Fig. S1: Workflow for RNA-seq gene mapping and quantification. (A)** Workflow diagram showing how samples were processed using the StringTie program, which performs genes mapping and quantification. Custom scripts were then used for the following: Part I: Identified gene transcripts were assigned as a Gencode or Refseq gene, or as a novel gene. Part II: Gencode transcripts were further filtered including

based on gene type. Part III: Novel genes were further filtered based on non-coding potential, length, number of transcripts and exons, and read coverage per exon. Part IV: Gene-level expression was considered as the sum of associated transcript expression. Table summarizing the number of transcripts and genes per gene type post filtering used in this study. **(B)** High confidence selected novel lncRNA genes are primarily intergenic or antisense. Sense-overlapping novel lncRNAs were considered low confidence and not-considered in this analysis. The majority of known lncRNAs in the Gencode database are either intergenic or antisense.
