# Supplementary material
Source: PubMed Central journal article supplement (PMC10787516)
Supplement: NIHMS1926721-supplement-9.pdf [file NIHMS1926721-supplement-9.pdf]

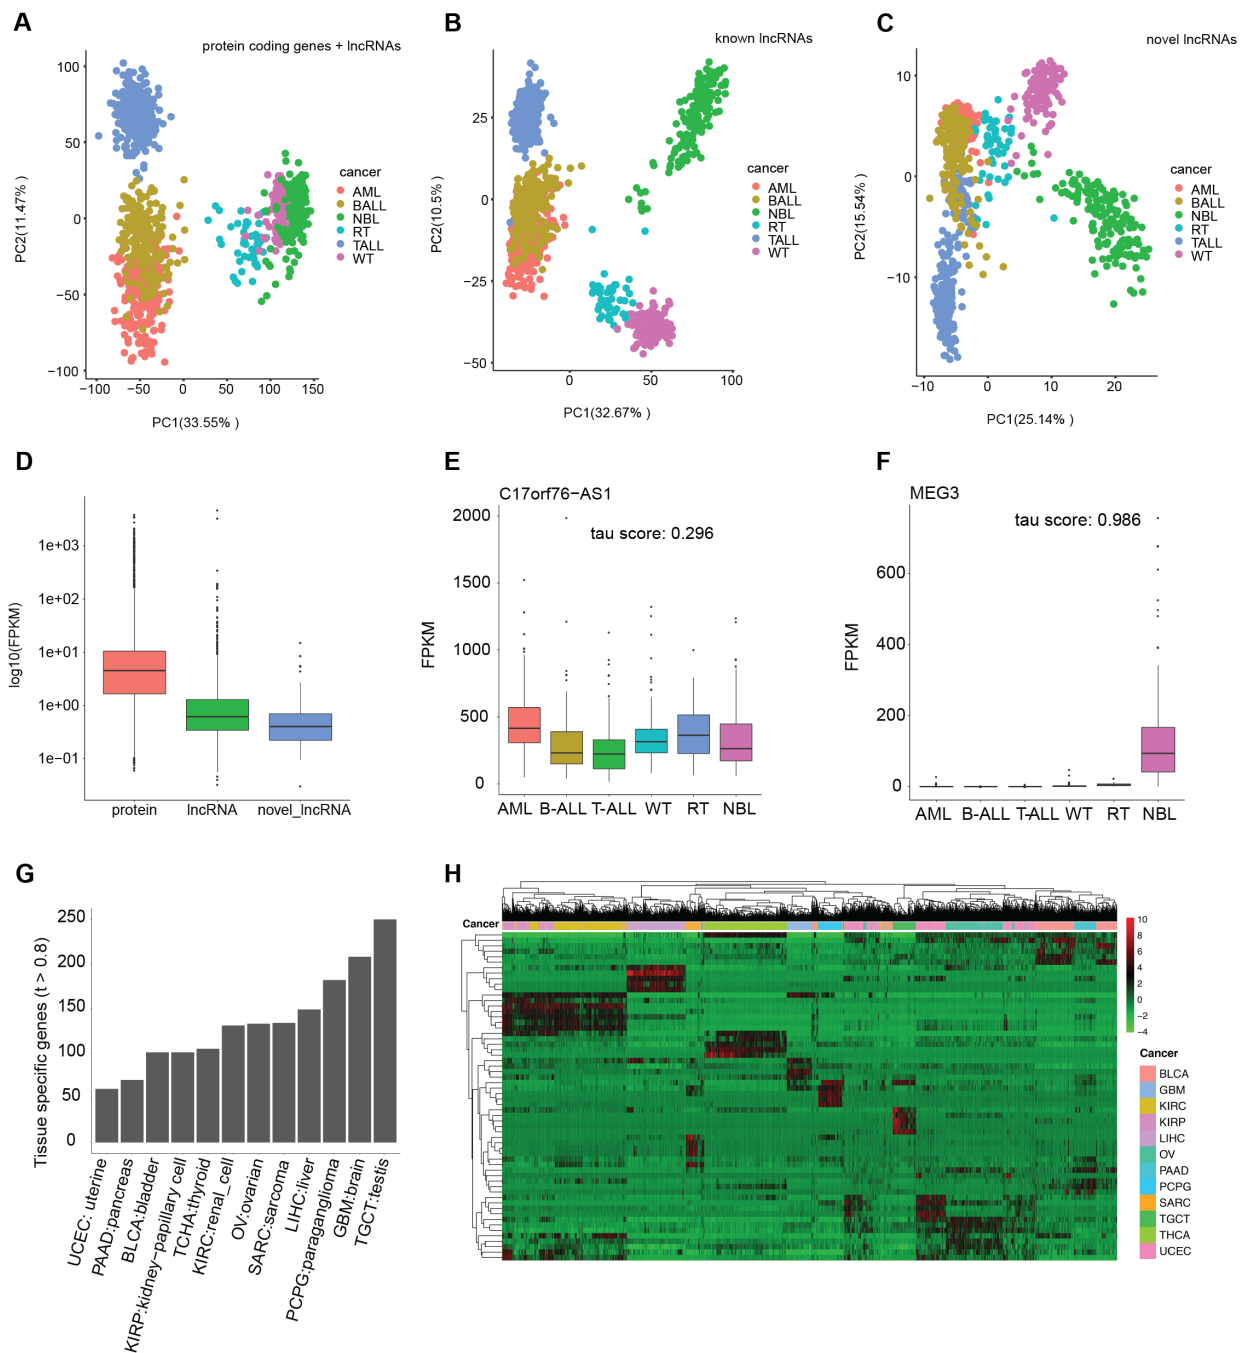

**Supplementary Fig. S2: IncRNA expression varies across pediatric cancers.** (A) PCA of protein coding gene and lncRNA expression across pediatric cancers. (B) PCA showing unsupervised clustering of known lncRNA gene expression alone and (C) using novel lncRNA expressing. Each cancer is more closely clustered together individually than in the PCA including both protein coding genes and lncRNAs, suggesting that each cancer has distinct lncRNA expression, except for AML and B-ALL, which appear to have very similar lncRNA expression. Similar clustering was seen in PC3 and PC4 for all three gene type PCAs. (D) Average expression of protein coding genes, known, and novel lncRNAs in order of highest average expression. (E) Expression of a ubiquitously expressed lncRNA: *C17orf76-AS1* and its tau score: 0.296 is low. (F) Expression of the *MEG3* lncRNA is primarily in NBL and thus has a higher tau score of 0.986, (tau score > 0.8 indicates tissue specificity). (G) The number of tissue specific lncRNAs across 12 adult cancers from TCGA. (H) Unsupervised clustering of the expression of the top 5 most TS lncRNAs (ranked by expression and tau score) in 12 adult cancers (total lncRNAs n=60).
