# Supplementary material
Source: PubMed Central journal article supplement (PMC10787516)
Supplement: NIHMS1926721-supplement-10.pdf [file NIHMS1926721-supplement-10.pdf]

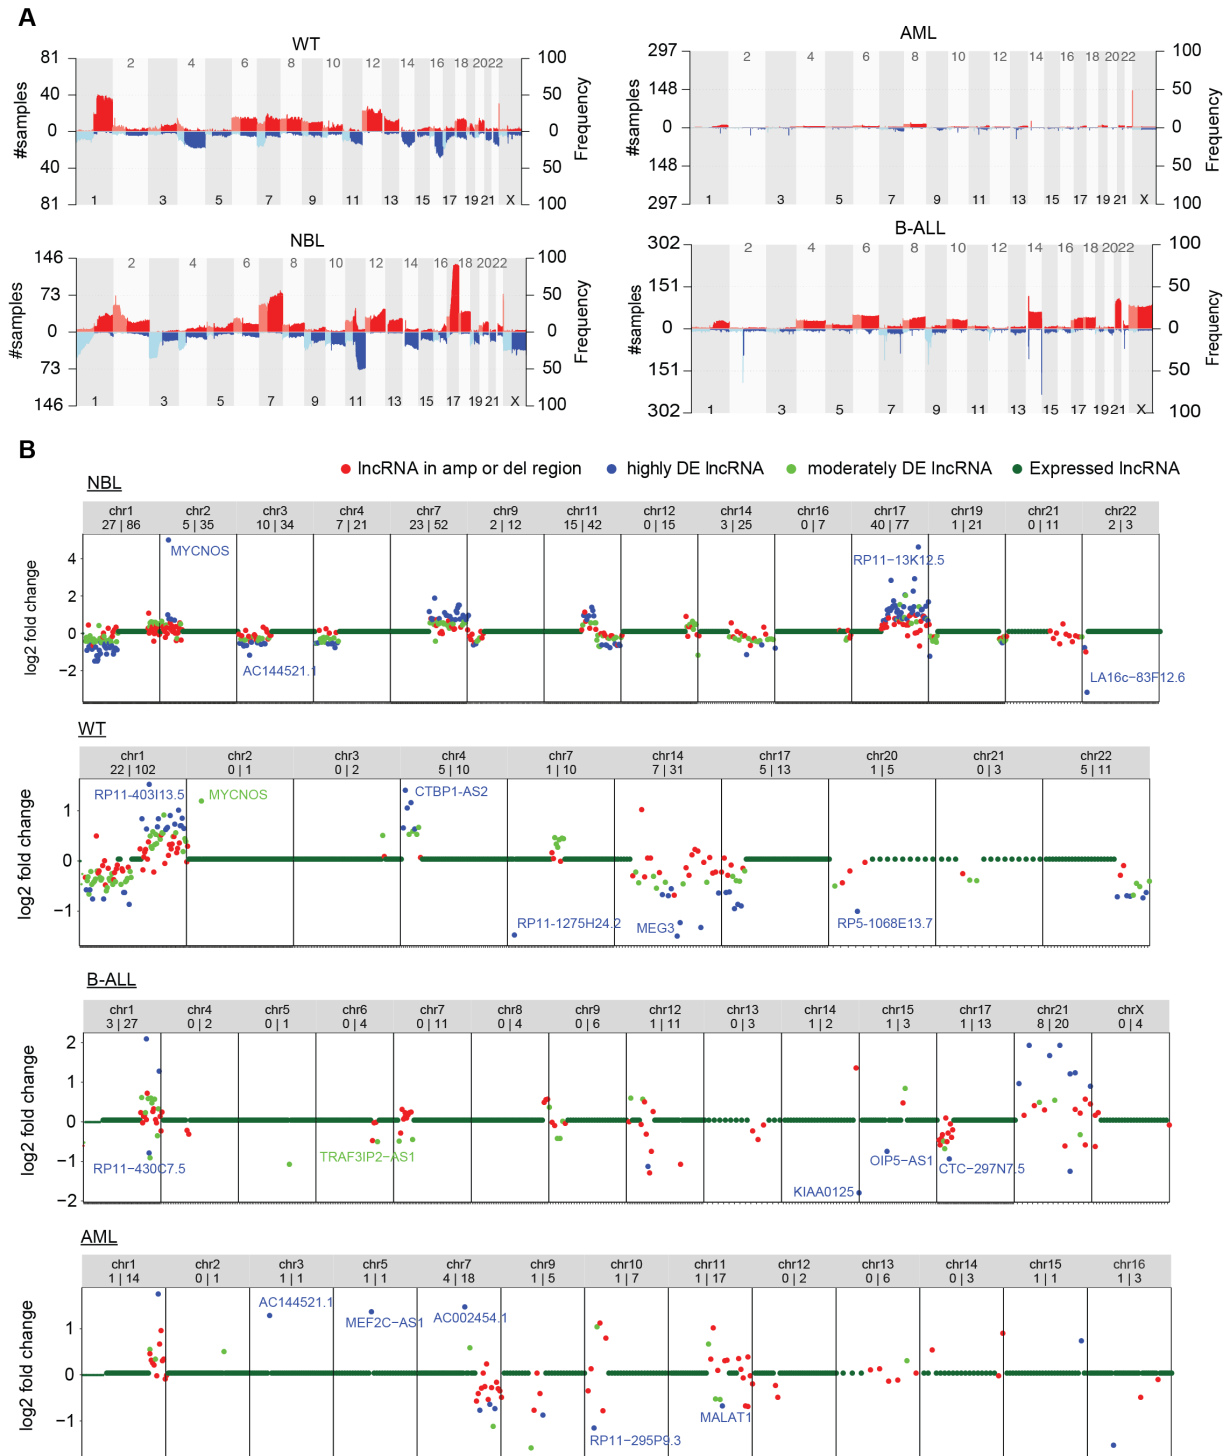

**Supplementary Fig. S3: Regions of somatic copy number aberration across cancers and genes dysregulated due to copy number. (A)** Plots of the frequency of copy number gain and loss across the genome for four pediatric cancer cohorts in this study. **(B)** IncRNA loci on chromosomes with copy number alterations across the pediatric cancers: NBL, WT, B-ALL, and AML. IncRNAs were evaluated to have differential expression due to copy number using the Wilcoxon rank sum test: highly differential:  $p$ -value  $< 0.05$  and  $\log |\text{fold change}| > 1.5$  and moderately differential:  $p$ -value  $< 0.1$  and  $\log |\text{fold change}| > 1.0$ . Points are colored based on loci in an amplified or deleted region of the chromosome and if the IncRNA is highly or moderately differentially expressed.
