# Supplementary material
Source: PubMed Central journal article supplement (PMC10787516)
Supplement: NIHMS1926721-supplement-11.pdf [file NIHMS1926721-supplement-11.pdf]

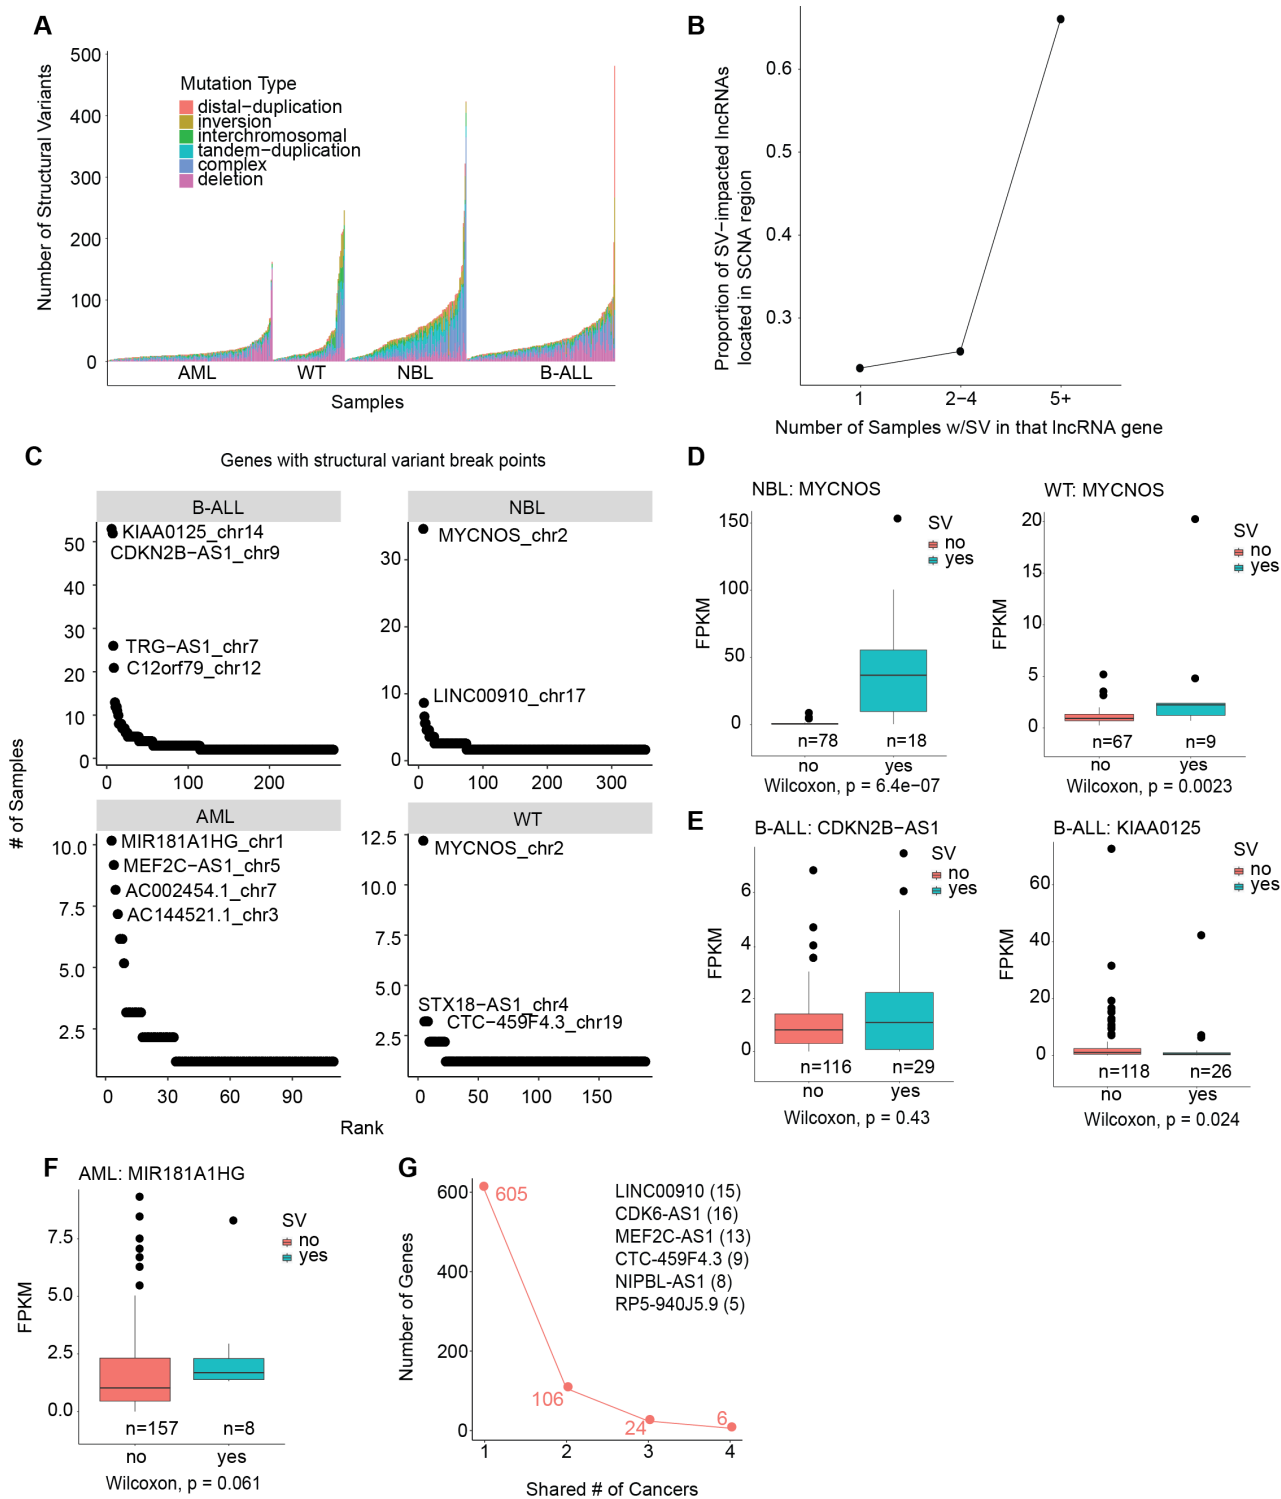

**Supplementary Fig. S4: Structural variants impact lncRNAs in pediatric cancers.** (A) The number and types of structural variants as annotated by Complete Genomics (CGI) per sample per cancer. (B) The number of samples with a structural variant in a lncRNA or protein coding gene (gene-sample pairs) vs number of lncRNA genes also found in copy number regions. (C) Ranking of genes with structural variants by the number of samples per cancer. (D) Expression of the top genes per cancer in samples with and without structural variant (NBL/WT: MYCNOS, (E) B-ALL: CDKN2B-AS1, KIAA0125, and (F) AML: MIR181A1HG. (G) The number of genes with a structural variant found in 1-4 cancers.
