# Supplementary material
Source: PubMed Central journal article supplement (PMC10787516)
Supplement: NIHMS1926721-supplement-15.pdf [file NIHMS1926721-supplement-15.pdf]

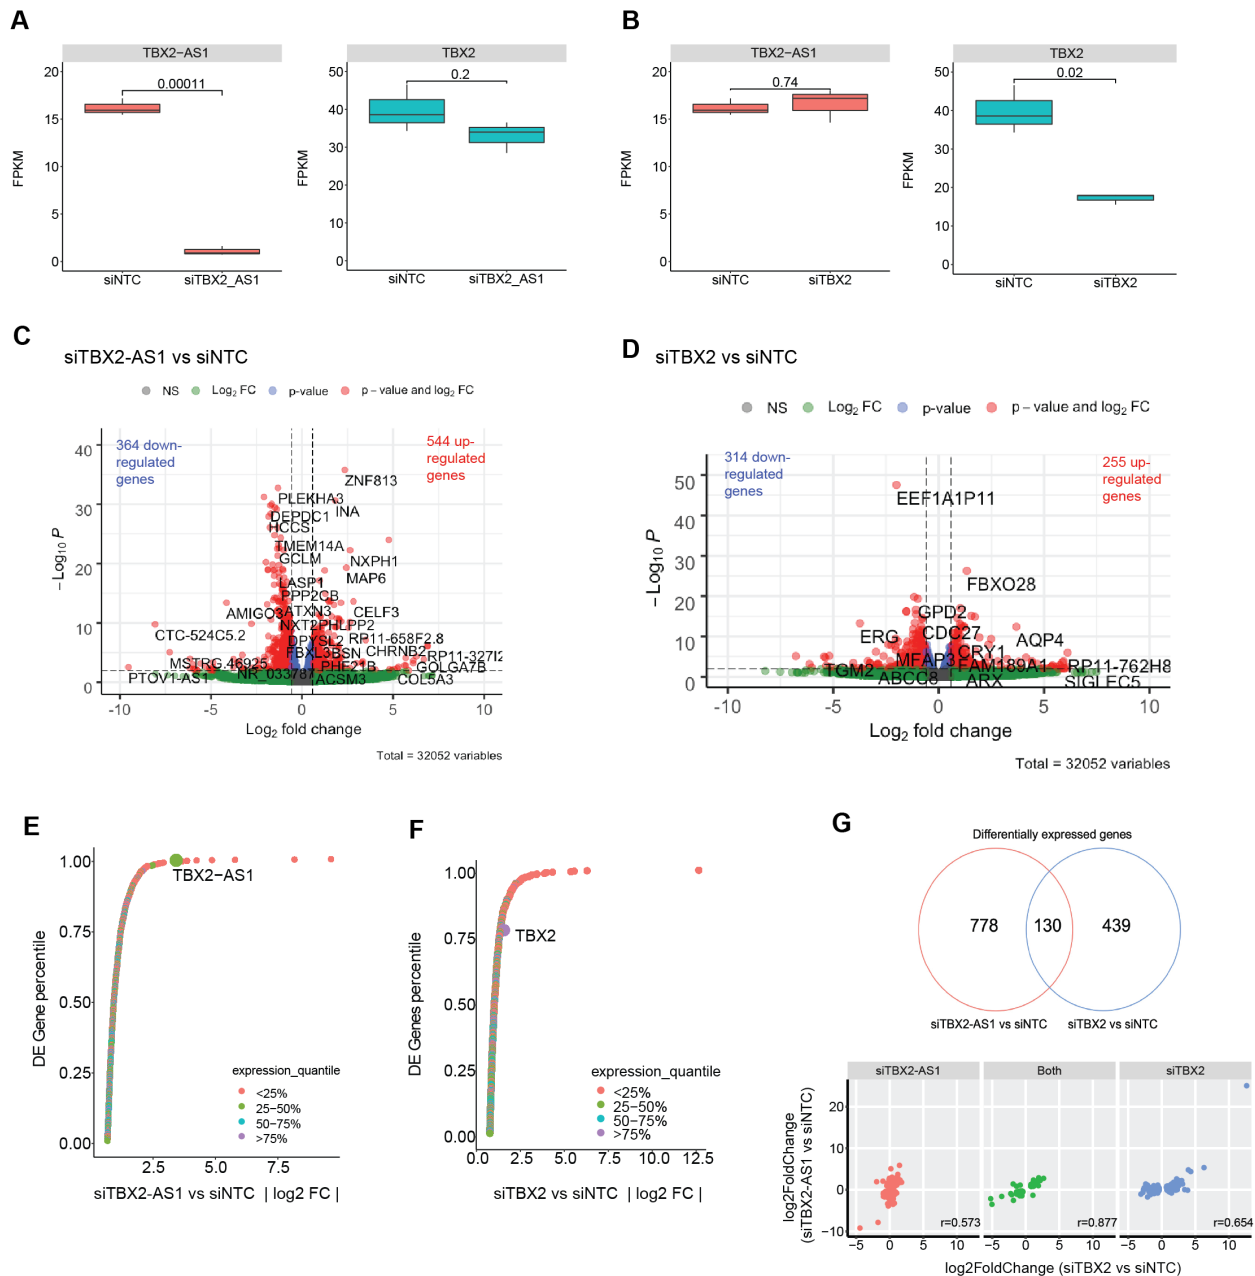

**Supplementary Fig. S8: RNA expression profiling following *TBX2-AS1* and *TBX2* knockdown in NLF.** (A) Expression of *TBX2-AS1* and *TBX2* based on RNA sequencing analysis of NLF cells treated with either non-targeting control (siNTC) or siTBX2-AS1. *TBX2-AS1* expression is significantly reduced, but no significant change in *TBX2* expression is observed. (B) Expression of *TBX2-AS1* and *TBX2* based on RNA sequencing analysis of NLF cells treated with either non-targeting control (siNTC) or siTBX2. *TBX2* expression is significantly reduced, but no change in *TBX2-AS1* expression is observed. (C) Volcano plot showing genes with significant dysregulation (log fold change > 1.5 and -log<sub>10</sub> p-value < 0.1) observed in transcriptomic profiling of NLF cells treated with siTBX2-AS1 or (D) siTBX2. (E) The log<sub>2</sub> fold change (FC) of significantly differentially expressed (DE) genes associated with siTBX2-AS1 or (F) siTBX2, plotted against their percentile rank and colored by gene expression quantile. (G) The number of DE genes overlapping between siTBX2-AS1 and siTBX2 and how correlated the log<sub>2</sub> FC of DE genes are in each condition.
